# Supplementary material for: Laboratory validation of an integrative passive sampler for per- and polyfluoroalkyl substances in water
Source: Royal Society of Chemistry journal article supplement (doi:10.1039/d3ew00047h), 2023-01-01
Supplement: d3ew00047h1.pdf [file d3ew00047h1.pdf]

## **SUPPLEMENTAL INFORMATION**

### **Laboratory Validation of an Integrative Passive Sampler for Per- and Polyfluoroalkyl Substances in Water**

Paul L. Edmiston\*,<sup>1</sup>, Noah Hill<sup>1</sup>, Riley Hershberger<sup>1</sup>, Heather Hartmann<sup>1</sup>, Craig Divine<sup>2</sup>, Erika Carter<sup>2</sup>

#### **Table of Contents**

|                                                                                                                                        |    |
|----------------------------------------------------------------------------------------------------------------------------------------|----|
| Table S1: PFAS compound list .....                                                                                                     | 2  |
| Table S2: PFAS concentrations for column breakthrough measurements .....                                                               | 3  |
| Table S3: Simulated groundwater composition .....                                                                                      | 3  |
| Table S4: MRM transitions .....                                                                                                        | 4  |
| Table S5: Surrogate recoveries .....                                                                                                   | 5  |
| Table S6: HPLC parameters.....                                                                                                         | 6  |
| Table S7: Limits of detection.....                                                                                                     | 7  |
| Figure S1: Accumulated mass by passive samplers over 90 days .....                                                                     | 8  |
| Table S8: Sampling rates ( $R_S$ ) measured for 90-day passive sampling .....                                                          | 9  |
| Figure S2: Surrogate uptake kinetics.....                                                                                              | 10 |
| Figure S3: Mass recovery vs. time for [M]PFBA, [M]8:2-FTS, and [M]PFOA.....                                                            | 11 |
| Figure S4: Accumulated mass vs time plots for PFNA, N-MeFOSA, and N-Me-FOSAA .....                                                     | 12 |
| Figure S5: Concentration of PFNA, N-MeFOSA, and N-Me-FOSAA during 14-day passive sampler testing .....                                 | 12 |
| Table S9: $R_S$ values for desorption and (ration adsorption/desorption rates) estimated from variable concentration experiments ..... | 13 |
| Table S10: $R_S$ values measured to date for the passive sampler .....                                                                 | 14 |

**Table S1: PFAS Compound List**

| Abbreviation              | Name                                                                                                        | Type                    | CAS #        |
|---------------------------|-------------------------------------------------------------------------------------------------------------|-------------------------|--------------|
| PFOSA                     | perfluorooctanesulfonamide                                                                                  | analyte                 | 754-91-6     |
| PFBA                      | perfluorobutanoic acid                                                                                      | analyte                 | 375-22-4     |
| PFPeA                     | perfluoropentanoic acid                                                                                     | analyte                 | 2706-90-3    |
| PFHxA                     | perfluorohexanoic acid                                                                                      | analyte                 | 307-24-4     |
| PFHpA                     | perfluoroheptanoic acid                                                                                     | analyte                 | 375-85-9     |
| PFOA                      | perfluorooctanoic acid                                                                                      | analyte                 | 335-67-1     |
| PFNA                      | perfluorononanoic acid                                                                                      | analyte                 | 375-95-1     |
| PFDA                      | perfluorodecanoic acid                                                                                      | analyte                 | 335-76-2     |
| PFUdA                     | perfluoroundecanoic acid                                                                                    | analyte                 | 2058-94-8    |
| PFDoA                     | perfluorododecanoic acid                                                                                    | analyte                 | 307-55-1     |
| PFTTrDa                   | perfluorotridecanoic acid                                                                                   | analyte                 | 72629-94-8   |
| PFTeDA                    | perfluorotetradecanoic acid                                                                                 | analyte                 | 376-06-7     |
| PFBS                      | perfluorobutanesulfonic acid                                                                                | analyte                 | 375-73-5     |
| PFHxS                     | perfluorohexanesulfonic acid                                                                                | analyte                 | 355-46-4     |
| PFOS                      | perfluorooctanesulfonic acid                                                                                | analyte                 | 1763-23-1    |
| [M]4:2 FTS                | 1H, 1H, 2H, 2H-[1,2- <sup>13</sup> C <sub>2</sub> ]perfluorohexane sulfonic acid                            | surrogate               | 2708218-88-4 |
| [M]6:2 FTS                | 1H, 1H, 2H, 2H-[1,2- <sup>13</sup> C <sub>2</sub> ]perfluorooctane sulfonic acid                            | surrogate               | 2708218-89-5 |
| [M]8:2 FTS                | 1H, 1H, 2H, 2H-[1,2- <sup>13</sup> C <sub>2</sub> ]perfluorodecane sulfonic acid                            | surrogate               | 2708218-90-8 |
| [M]PFOSA                  | Perfluoro-2-[ <sup>13</sup> C <sub>4</sub> ]octanesulfonamide                                               | surrogate               | 960315-53-1  |
| [M]HFPO-DA                | Tetrafluoro-2-(heptafluoropropoxy) <sup>13</sup> C-propanoic acid                                           | surrogate               | -            |
| [M]PFBA                   | Perfluoro-n-[1,2,3,4- <sup>13</sup> C <sub>4</sub> ]butanoic acid                                           | surrogate               | 1017281-29-6 |
| [M5]PFPeA                 | Perfluoro-n-[1,2,3,4,5- <sup>13</sup> C <sub>5</sub> ]pentanoic acid                                        | surrogate               | -            |
| [M]PFHxA                  | Perfluoro-n-[1,2,- <sup>13</sup> C <sub>3</sub> ]hexanoic acid                                              | surrogate               | 960315-47-3  |
| [M4]PFHpA                 | Perfluoro-n-[1,2,3,4- <sup>13</sup> C <sub>4</sub> ]heptanoic acid                                          | surrogate               | 2328024-55-9 |
| [M]PFOA                   | Perfluoro-n-[1,2,3,4- <sup>13</sup> C <sub>4</sub> ]octanoic acid                                           | surrogate               | 960315-51-9  |
| [M]PFNA                   | Perfluoro-n-[1,2,3,4- <sup>13</sup> C <sub>4</sub> ]nonanoic acid                                           | surrogate               | 960315-49-5  |
| [M]PFDA                   | Perfluoro-n-[1,2,3,4- <sup>13</sup> C <sub>4</sub> ]decanoic acid                                           | surrogate               | 960315-50-8  |
| [M]PFUdA                  | Perfluoro-n-[1,2- <sup>13</sup> C <sub>2</sub> ]undecanoic acid                                             | surrogate               | 960315-51-9  |
| [M]PFDoA                  | Perfluoro-n-[1,2- <sup>13</sup> C <sub>2</sub> ]dodecanoic acid                                             | surrogate               | 960315-52-0  |
| [M]PFTeDA                 | Perfluoro-n-[1,2- <sup>13</sup> C <sub>2</sub> ]tetradodecanoic acid                                        | surrogate               | 864071-08-9  |
| [M3]PFBS                  | Perfluoro-1-[2,3,4- <sup>13</sup> C <sub>3</sub> ]butanesulfonate                                           | surrogate               | 2708218-84-0 |
| [M]PFHxS                  | Perfluoro-1-[ <sup>18</sup> O <sub>2</sub> ]hexanesulfonate                                                 | surrogate               | -            |
| d <sub>5</sub> -N-EtFOSAA | N-ethyl-d <sub>5</sub> -perfluoro-1-octanesulfonamidoacetic acid                                            | surrogate               | 1265205-97-7 |
| d <sub>3</sub> -N-MeFOSA  | N-methyl-d <sub>3</sub> -perfluoro-1-octanesulfonamide                                                      | surrogate               | 936109-37-4  |
| d <sub>7</sub> -N-MeFOSE  | 2-(N-methyl-d <sub>3</sub> -perfluoro-1-octanesulfonamido)ethan-d <sub>4</sub> -ol                          | surrogate               | 1265205-95-5 |
| d <sub>9</sub> -N-EtFOSE  | 2-(N-ethyl-d <sub>5</sub> -perfluoro-1-octanesulfonamido)ethan-d <sub>4</sub> -ol                           | surrogate               | 1265205-96-6 |
| [M8]PFOS                  | Sodium perfluoro-1-[ <sup>13</sup> C <sub>8</sub> ]octanesulfonate [ <sup>13</sup> C <sub>8</sub> ]octanoic | internal std            | 2522762-16-7 |
| [M2]PFOA                  | Perfluoro-n-[1,2- <sup>13</sup> C <sub>2</sub> ]octanoic acid                                               | internal std            | 864071-08-9  |
| d <sub>3</sub> -N-MeFOSAA | N-methyl-d <sub>3</sub> -perfluoro-1-octanesulfonamidoacetic acid                                           | internal std, surrogate |              |

**Table S2.** PFAS concentrations for column breakthrough measurements measured by HPLC-MS/MS

| <b>PFAS</b> | <b>Concentration (µg/L)</b> |
|-------------|-----------------------------|
| PFBA        | 820                         |
| PFPeA       | 720                         |
| PFHxA       | 870                         |
| PFHpA       | 230                         |
| PFOA        | 470                         |
| PFNA        | 400                         |
| PFDA        | 67                          |
| PFBS        | 520                         |
| PFHxS       | 530                         |
| PFOS        | 240                         |
| PFOSA       | 77                          |

**Table S3.** Simulated groundwater composition

| <b>Solute</b>                 | <b>Concentration (mg/L)</b> |
|-------------------------------|-----------------------------|
| <i>Cations</i>                |                             |
| Ca <sup>2+</sup>              | 10                          |
| Mg <sup>2+</sup>              | 1.5                         |
| Na <sup>+</sup>               | 14                          |
| <i>Anions</i>                 |                             |
| HCO <sub>3</sub> <sup>-</sup> | 25                          |
| Cl <sup>-</sup>               | 22                          |
| SO <sub>4</sub> <sup>2-</sup> | 10                          |
| <i>Natural Organic Matter</i> |                             |
| Humic acid                    | 1.0                         |
|                               |                             |
| pH                            | 7.2                         |
| conductivity                  | 128 mS                      |

**Note:** for 90-day passive sampler experiment humic acid was not added.

**Table S4.** MRM transitions used in HPLC-MS/MS measurements

| Compound          | Retention Time (min) | MRM Transition ( <i>m/z</i> ) |            | MS Parameters |    |
|-------------------|----------------------|-------------------------------|------------|---------------|----|
|                   |                      | precursor                     | product(s) | fragmentor    | CE |
| <b>4:2 FTS</b>    | 15.19                | 327                           | 307        | 69            | 18 |
|                   |                      | 327                           | 80         | 69            | 32 |
| <i>[M]4:2 FTS</i> |                      | 329                           | 309        | 69            | 18 |
| <b>6:2 FTS</b>    | 19.33                | 427                           | 407        | 66            | 24 |
|                   |                      |                               | 80         | 66            | 44 |
| <i>[M]6:2 FTS</i> |                      | 429                           | 409        | 66            | 24 |
| <b>8:2 FTS</b>    | 21.86                | 527                           | 507        | 66            | 32 |
|                   |                      | 527                           | 80         | 66            | 52 |
| <i>[M]8:2 FTS</i> |                      | 529                           | 509        | 66            | 32 |
| <b>PFOSA</b>      | 22.41                | 498                           | 78         | 69            | 40 |
| <i>[M]PFOSA</i>   |                      | 506                           | 78         | 69            | 40 |
| <b>HFPO-DA</b>    | 15.93                | 285                           | 169        | 70            | 8  |
| <i>[M]HFPO-DA</i> |                      | 287                           | 169        | 70            | 8  |
| <b>PFBA</b>       | 10.32                | 213                           | 168.9      | 50            | 8  |
| <i>[M]PFBA</i>    |                      | 217                           | 172        | 50            | 8  |
| <b>PFPeA</b>      | 13.21                | 263                           | 218.9      | 60            | 8  |
| <i>[M5]PFPeA</i>  |                      | 268                           | 223        | 60            | 8  |
| <b>PFHxA</b>      | 15.35                | 313                           | 268.9      | 70            | 8  |
|                   |                      |                               | 119        | 70            | 18 |
| <i>[M]PFHxA</i>   |                      | 318                           | 273        | 70            | 8  |
| <b>PFHpA</b>      | 17.44                | 362.9                         | 319        | 72            | 6  |
|                   |                      |                               | 169        | 72            | 12 |
| <i>[M4]PFHpA</i>  |                      | 367                           | 322        | 72            | 6  |
| <b>PFOA</b>       | 19.36                | 413                           | 369        | 69            | 4  |
|                   |                      |                               | 169        | 69            | 12 |
| <i>[M]PFOA</i>    |                      | 415                           | 370        | 69            | 4  |
| <i>[M8]PFOA</i>   |                      | 421                           | 376        | 69            | 4  |
| <b>PFNA</b>       | 20.89                | 463                           | 419        | 66            | 4  |
|                   |                      |                               | 169        | 66            | 17 |
| <i>[M]PFNA</i>    |                      | 472                           | 427        | 66            | 4  |
| <b>PFDA</b>       | 21.81                | 513                           | 469        | 69            | 8  |
|                   |                      |                               | 218.7      | 100           | 16 |
| <i>[M]PFDA</i>    |                      | 519                           | 474        | 69            | 8  |
| <b>PFUdA</b>      | 22.46                | 563                           | 519        | 66            | 4  |
| <i>[M]PFUdA</i>   |                      | 570                           | 525        | 66            | 4  |
| <b>PFDoA</b>      | 22.99                | 613                           | 569        | 79            | 8  |
| <i>[M]PFDoA</i>   |                      | 615                           | 570        | 79            | 8  |
| <b>PFTeDA</b>     | 23.51                | 663                           | 619        | 79            | 14 |
| <b>PFTeDA</b>     | 24.07                | 713                           | 669        | 79            | 14 |
| <i>[M]PFTeDA</i>  |                      | 715                           | 670        | 79            | 14 |
| <b>PFBS</b>       | 13.55                | 298.9                         | 98.9       | 69            | 44 |
|                   |                      |                               | 79.9       | 69            | 32 |
| <i>[M3]PFBS</i>   |                      | 302                           | 80         | 69            | 32 |
| <b>PFHxS</b>      | 17.49                | 398.9                         | 99         | 90            | 75 |
|                   |                      |                               | 80         | 90            | 41 |
| <i>[M]PFHxS</i>   |                      | 402                           | 80         | 90            | 41 |
| <b>PFOS</b>       | 20.86                | 498.9                         | 99         | 100           | 50 |
|                   |                      |                               | 80         | 100           | 50 |
| <i>[M]PFOS</i>    |                      | 403                           | 80         | 100           | 50 |
| <i>[M8]PFOS</i>   |                      | 407                           | 80         | 100           | 50 |
| N-MeFOSAA         | 21.90                | 570                           | 418.9      | 115           | 20 |

|                                           |       |     |       |     |    |
|-------------------------------------------|-------|-----|-------|-----|----|
|                                           |       |     |       |     |    |
| <i>d</i> <sub>3</sub> - <i>N</i> -MeFOSAA | 22.20 | 573 | 418.9 | 115 | 20 |
| N-MeFOSA                                  | 23.50 | 512 | 168.9 | 115 | 20 |
| <i>d</i> <sub>3</sub> - <i>N</i> -MeFOSA  | 23.50 | 515 | 168.9 | 115 | 20 |
| <i>d</i> <sub>3</sub> - <i>N</i> -MeFOSE  | 23.20 | 623 | 59.2  | 115 | 20 |
| <i>d</i> <sub>3</sub> - <i>N</i> -EtFOSE  | 24.01 | 639 | 59.2  | 115 | 16 |

**Table S5.** Surrogate recoveries from passive samplers.

| Surrogate             | Percent Recovery |          |
|-----------------------|------------------|----------|
|                       | Range            | Average  |
| [M]4:2 FTS            | 33-129           | 71 ± 24  |
| [M]6:2 FTS            | 30-169           | 88 ± 37  |
| [M]8:2 FTS            | 36-147           | 77 ± 29  |
| [M]FOSA               | 6-119            | 51 ± 24  |
| [M]HFPO-DA            | 36-114           | 88 ± 25  |
| [M]PFBA               | 27-131           | 67 ± 23  |
| [M5]PFPeA             | 37-188           | 87 ± 37  |
| [M]PFH <sub>x</sub> A | 29-145           | 71 ± 27  |
| [M4]PFHpA             | 33-158           | 81 ± 27  |
| [M]PFOA               | 43-153           | 79 ± 30* |
| [M]PFNA               | 40-120           | 74 ± 19  |
| [M]PFDA               | 35-155           | 84 ± 31  |
| [M]PFUdA              | 23-110           | 60 ± 20  |
| [M]PFDoA              | 9-162            | 49 ± 26  |
| [M]PFTeDA             | 5-104            | 35 ± 19  |
| [M]PFBS               | 45-146           | 87 ± 27  |
| [M]PFH <sub>x</sub> S | 38-109           | 64 ± 17  |
| [M]PFOS               | 36-143           | 71 ± 25* |

(n=31) \* Recoveries of PFOA and PFOS reduced by ion suppression with several samples with high concentrations. Nominal recoveries are 80-100%

**Table S6: HPLC Parameters**

|                        |                                     |      |
|------------------------|-------------------------------------|------|
| <b>Solvent</b>         |                                     |      |
| Solvent A              | water, 5 mM ammonium acetate        |      |
| Solvent B              | 95% methanol, 5 mM ammonium acetate |      |
|                        |                                     |      |
| <b>Flow rate</b>       | 0.250 mL/min                        |      |
| <b>Temp</b>            | 45°C                                |      |
|                        |                                     |      |
| <b>Solvent Program</b> | A                                   | B    |
| 0.00 min               | 70%                                 | 30%  |
| 3.00 min               | 70%                                 | 30%  |
| 5.00 min               | 40%                                 | 60%  |
| 14.00 min              | 20%                                 | 80%  |
| 17.00 min              | 0%                                  | 100% |
| 26.00 min              | 0%                                  | 100% |
|                        |                                     |      |
| <b>Post time</b>       | 7 min                               |      |
| <b>Inj. volume</b>     | 5 µL (with needle wash)             |      |

**QQQ Parameters**

|                            |              |
|----------------------------|--------------|
| <b>Mode</b>                | Negative ion |
| <b>Needle voltage</b>      | -4,000 V     |
| <b>Gas Flow</b>            | 11 L/min     |
| <b>Gas Temp</b>            | 300°C        |
| <b>Accelerator voltage</b> | 2 V          |

**Table S7:** LOQs and LODs for passive samplers and grab samples measured using SPE

| Analyte | Concentration (ng/L)           |      |                            |      |
|---------|--------------------------------|------|----------------------------|------|
|         | Passive Sampler <sup>(1)</sup> |      | Grab Sample <sup>(2)</sup> |      |
|         | MDL <sup>(3)</sup>             | LOD  | MDL                        | LOD  |
| 4:2 FTS | 3.0                            | 1.4  | 3.2                        | 1.6  |
| 6:2 FTS | 3.7                            | 1.7  | 3.9                        | 2.0  |
| 8:2 FTS | 4.4                            | 2.1  | 4.6                        | 2.4  |
| HFPO-DA | 49.2                           | 22.9 | 51.5                       | 26.4 |
| PFOSA   | 3.2                            | 1.5  | 3.3                        | 1.7  |
| PFBA    | 7.6                            | 3.6  | 2.5                        | 1.3  |
| PFPeA   | 4.4                            | 2.1  | 2.2                        | 1.1  |
| PFHxA   | 6.2                            | 2.9  | 4.8                        | 2.5  |
| PFHpA   | 0.7                            | 0.3  | 0.7                        | 0.4  |
| PFOA    | 1.5                            | 0.7  | 1.6                        | 0.8  |
| PFNA    | 0.5                            | 0.2  | 0.5                        | 0.3  |
| PFDA    | 1.2                            | 0.5  | 1.4                        | 0.7  |
| PFUdA   | 0.9                            | 0.4  | 1.0                        | 0.5  |
| PFDoA   | 0.8                            | 0.4  | 0.8                        | 0.4  |
| PFTTrDA | 1.2                            | 0.5  | 1.2                        | 0.6  |
| PFTeDA  | 1.7                            | 0.8  | 1.8                        | 0.9  |
| PFBS    | 1.8                            | 0.8  | 1.9                        | 1.0  |
| PFHxS   | 2.5                            | 1.2  | 2.7                        | 1.4  |
| PFOS    | 1.1                            | 0.5  | 1.1                        | 0.6  |

(1) Values correspond to a 10-day sampling time at 25°C in a flowing water stream.

(2) 250 mL grab sample reconstituted in 1.0 mL prior to LC-MS.

(3) Method detection limit.

(4) Limit of detection.

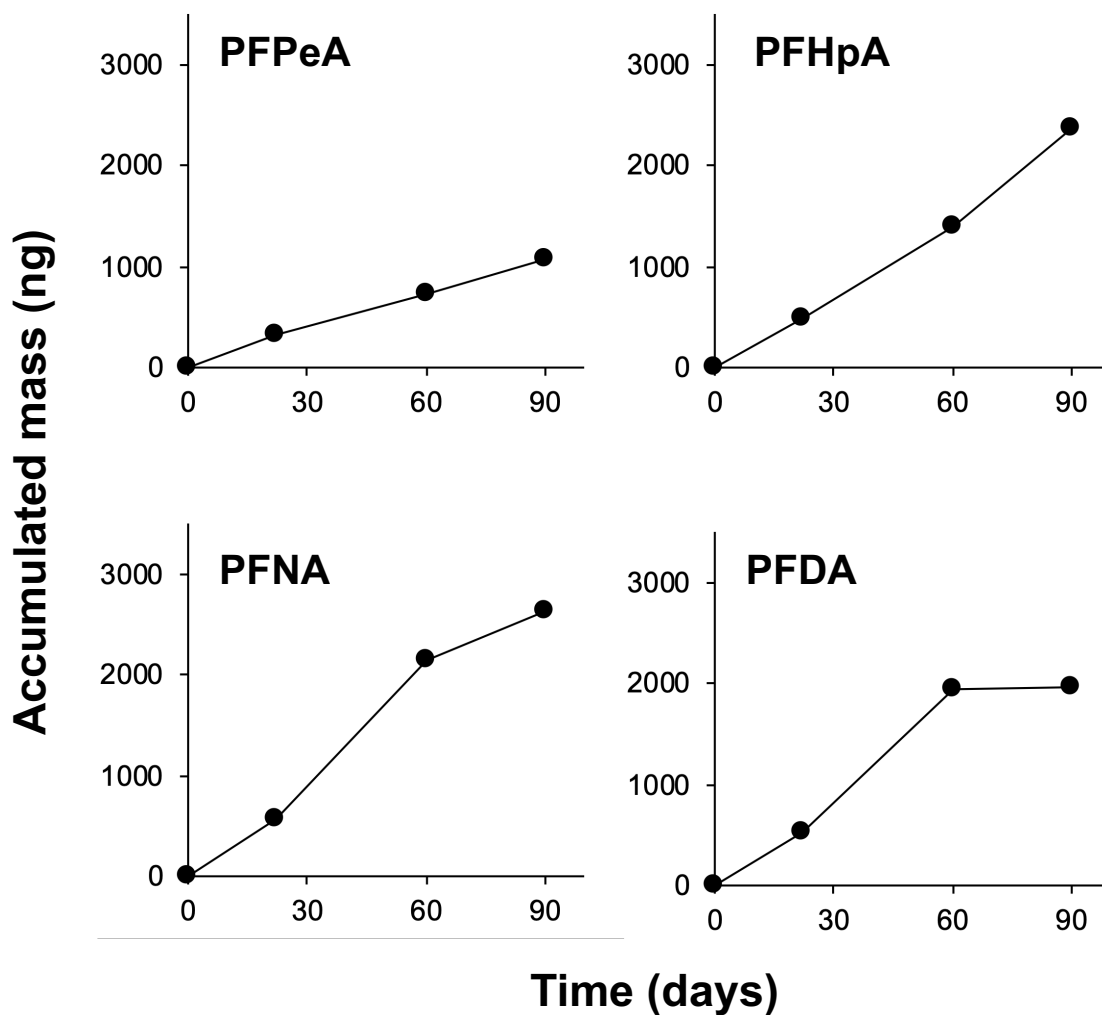

**Fig S1.** Accumulated mass by passive samplers over time for PFPeA, PFHpA, PFNA, and PFDA in bench-scale measurements. The flow rate was 0.38 cm/min with 2.5  $\mu\text{g/L}$  of each PFAS compound in simulated groundwater without humic acid.



**Table S8.** Sampling rates ( $R_s$ ) measured for 90-day passive sampling compared to sampling rates measured previously for 12 day sampling times.

| <b>PFAS</b> | <b><math>R_s</math> (L/day)<br/>90 days</b> | <b><math>R_s</math> (L/day)<br/>12 days<sup>1</sup></b> |
|-------------|---------------------------------------------|---------------------------------------------------------|
| PFBA        | 0.0029                                      | 0.0027                                                  |
| PFPeA       | 0.0047                                      | 0.0060                                                  |
| PFHxA       | 0.0127                                      | 0.0081                                                  |
| PFHpA       | 0.0105                                      | 0.0092                                                  |
| PFOA        | 0.0110                                      | 0.0111                                                  |
| PFNA        | 0.0124                                      | 0.0114                                                  |
| PFDA        | 0.0132                                      | n/m                                                     |
| PFBS        | 0.0103                                      | 0.0119                                                  |
| PFHxS       | 0.0152                                      | 0.0200                                                  |
| PFOS        | 0.0141                                      | 0.0116                                                  |

<sup>1</sup>(Hartman et al. 2021) n/m: not measured

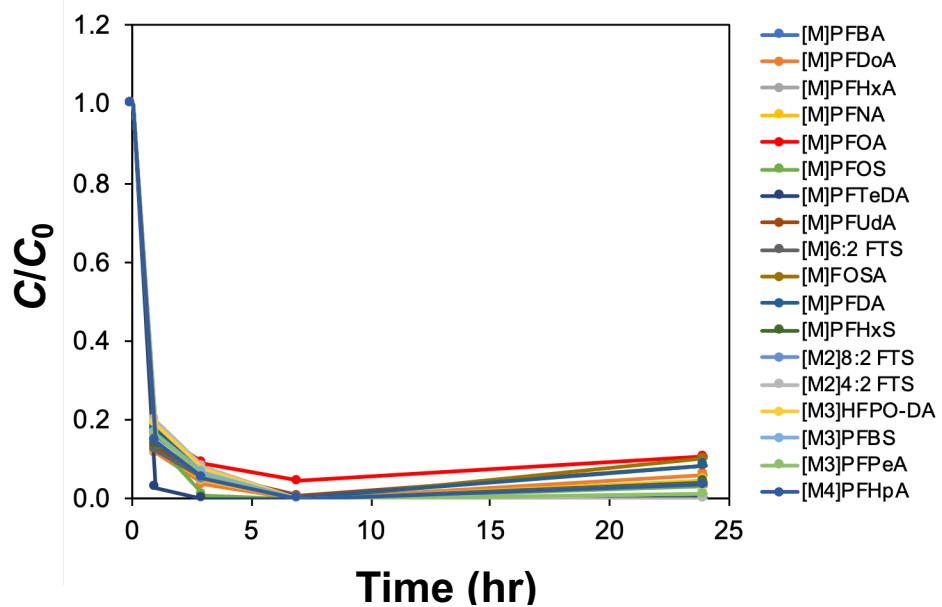

**Fig S2.** Normalized surrogate concentration  $C/C_0$  (where  $C_0$  is the initial concentration) vs. time depicting uptake during passive sampler analysis.

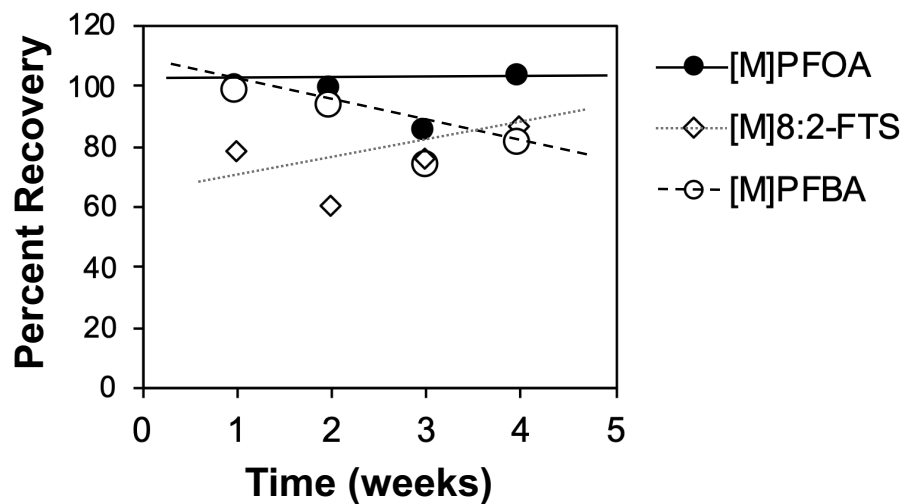

**Fig S3.** Change in the percent recovery of [M]PFOA, [M]8:2-FTS, and [M]PFBA over 4 weeks of passive sampler storage at 4°C.

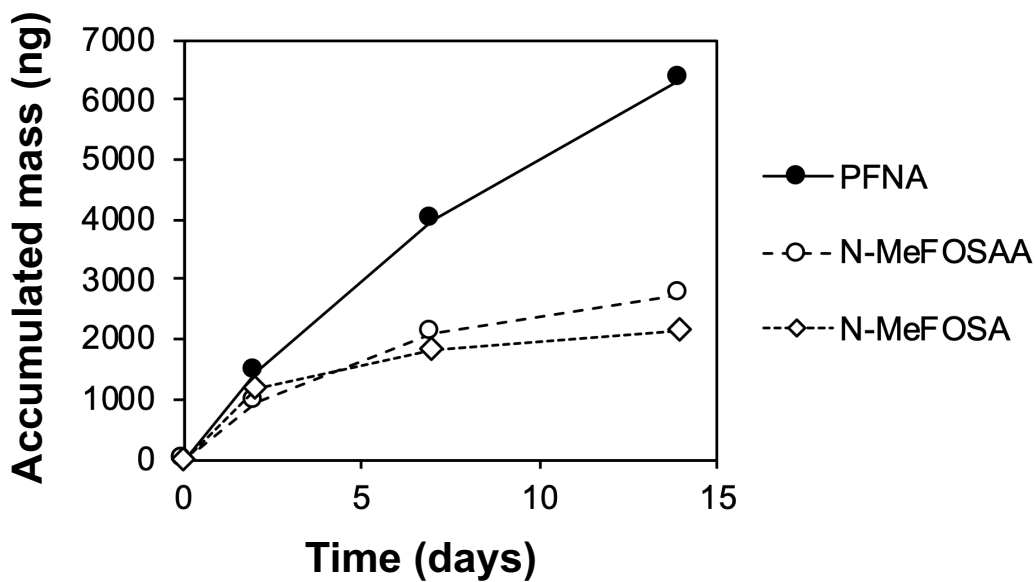

**Fig S4.** Accumulated mass vs time plots for PFNA, N-MeFOSAA, and N-Me-FOSA.

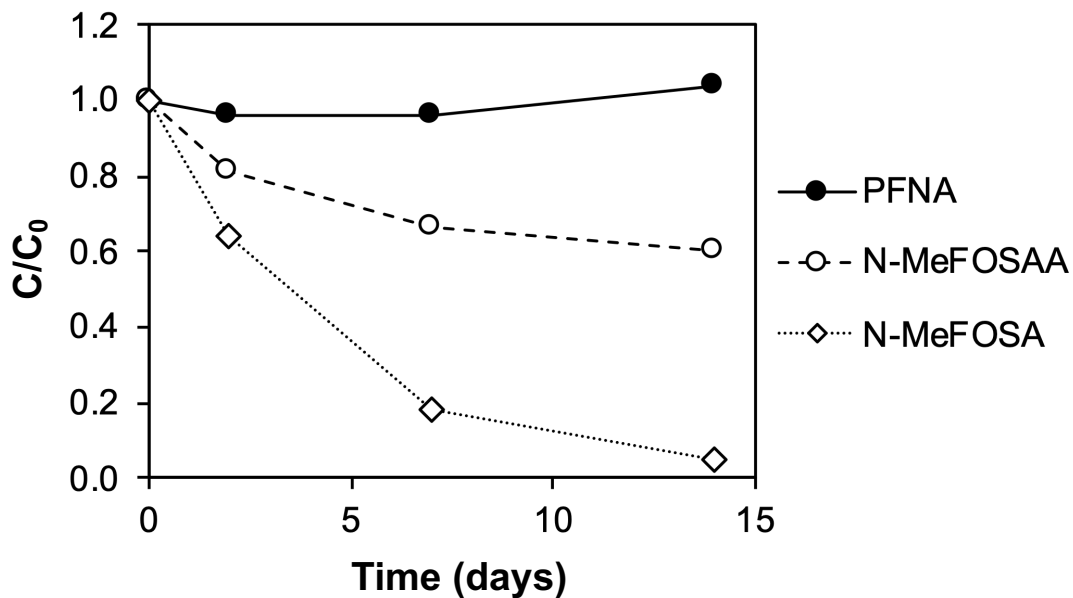

**Fig S5.** Concentration of PFNA, N-MeFOSAA, and N-Me-FOSA during 14-day passive sampler exposure vs. time testing.

**Table S9.**  $R_s$  values for desorption and (ration adsorption/desorption rates) estimated from variable concentration experiments.

| <b>Analyte</b>                       | <b>Estimated <math>R_{s, \text{ desorb}}</math> (desorption)</b> | <b>Ratio <math>R_{s, \text{ adsorb}}/R_{s, \text{ desorb}}</math></b> |
|--------------------------------------|------------------------------------------------------------------|-----------------------------------------------------------------------|
| Perfluorobutanoic acid (PFBA)        | 0.00062                                                          | 13.0                                                                  |
| Perfluoropentanoic acid (PFPeA)      | 0.00038                                                          | 26.6                                                                  |
| Perfluorohexanoic acid (PFHxA)       | 0.00032                                                          | 40.8                                                                  |
| Perfluoroheptanoic acid (PFHpA)      | 0.00017                                                          | 75.8                                                                  |
| Perfluorooctanoic acid (PFOA)        | 0.00005                                                          | 240.5                                                                 |
| Perfluorononanoic acid (PFNA)        | 0.00014                                                          | 89.9                                                                  |
| Perfluorodecanoic acid (PFDA)        | 0.00021                                                          | 62.6                                                                  |
| perfluorobutanesulfonic acid (PFBS)  | 0.00023                                                          | 68.5                                                                  |
| Perfluorohexanesulfonic acid (PFHxS) | 0.00016                                                          | 98.2                                                                  |
| Perfluorooctanesulfonic acid (PFOS)  | 0.00021                                                          | 77.9                                                                  |

**Table S10.**  $R_s$  values measured to date for the passive sampler.

| Water Flow Rate 0-2 cm/min<br>(e.g., Monitoring Well) |                                    |         | Water Flow Rate > 2 cm/min<br>(e.g., Flowing Stream) |                                    |         |                                                |
|-------------------------------------------------------|------------------------------------|---------|------------------------------------------------------|------------------------------------|---------|------------------------------------------------|
| Analyte                                               | Sampling Rate<br>( $R_s$ in L/day) |         | Analyte                                              | Sampling Rate<br>( $R_s$ in L/day) |         | Conditional<br>Limit of<br>Detection<br>(ng/L) |
|                                                       | Water Temp                         |         |                                                      | Water Temp                         |         |                                                |
|                                                       | <10°C                              | 10-25°C |                                                      | <10°C                              | 10-25°C |                                                |
| PFBA                                                  | 0.0033                             | 0.0033  | PFBA                                                 | 0.0120                             | 0.0120  | 3.6                                            |
| PFPeA                                                 | 0.0054                             | 0.0063  | PFPeA                                                | 0.0146                             | 0.0170  | 2.1                                            |
| PFHxA                                                 | 0.0062                             | 0.0093  | PFHxA                                                | 0.0342                             | 0.0510  | 2.9                                            |
| PFHpA                                                 | 0.0056                             | 0.0112  | PFHpA                                                | 0.0305                             | 0.0610  | 0.3                                            |
| PFOA                                                  | 0.0056                             | 0.0124  | PFOA                                                 | 0.0293                             | 0.0650  | 0.7                                            |
| PFNA                                                  | 0.0066                             | 0.0131  | PFNA                                                 | 0.0340                             | 0.0680  | 0.2                                            |
| PFDA                                                  | 0.0066                             | 0.0131  | PFDA                                                 | 0.0340                             | 0.0680  | 0.5                                            |
| PFUdA                                                 | 0.0056                             | 0.0124  | PFUdA                                                | 0.0293                             | 0.0650  | 0.4                                            |
| PFDoA                                                 | 0.0056                             | 0.0124  | PFDoA                                                | 0.0270                             | 0.0600  | 0.4                                            |
| PFTeDA                                                | 0.0005                             | 0.0012  | PFTeDA                                               | 0.0270                             | 0.0600  | 0.8                                            |
| PFTTrDA                                               | 0.0054                             | 0.0120  | PFTTrDA                                              | 0.0270                             | 0.0600  | 0.5                                            |
| PFBS                                                  | 0.0054                             | 0.0121  | PFBS                                                 | 0.0248                             | 0.0550  | 0.8                                            |
| PFHxS                                                 | 0.0068                             | 0.0150  | PFHxS                                                | 0.0315                             | 0.0700  | 1.2                                            |
| PFOS                                                  | 0.0056                             | 0.0125  | PFOS                                                 | 0.0293                             | 0.0650  | 0.5                                            |
| 4:2 FTS                                               | 0.0054                             | 0.0120  | 4:2 FTS                                              | 0.0270                             | 0.0600  | 1.4                                            |
| 6:2 FTS                                               | 0.0054                             | 0.0120  | 6:2 FTS                                              | 0.0270                             | 0.0600  | 1.7                                            |
| 8:2 FTS                                               | 0.0054                             | 0.0120  | 8:2 FTS                                              | 0.0270                             | 0.0600  | 2.1                                            |
| PFOSA                                                 | 0.0054                             | 0.0120  | PFOSA                                                | 0.0270                             | 0.0600  | 1.5                                            |
| HFPO-DA                                               | 0.0054                             | 0.0120  | HFPO-DA                                              | 0.0270                             | 0.0600  | 22.9                                           |
| NMeFOSA                                               | 0.0055                             | 0.0125  | NMeFOSA                                              | 0.0300                             | 0.0670  | 1.9                                            |
| NMeFOSAA                                              | 0.0050                             | 0.0063  | NMeFOSAA                                             | 0.0171                             | 0.0380  | 1.9                                            |
